# Supplementary material for: In Comparison to Pathological Q Waves, Selvester Score Is a Superior Diagnostic Indicator of Increased Long-Term Mortality Risk in ST Elevation Myocardial Infarction Patients Treated with Primary Coronary Intervention
Source: MDPI journal article supplement (doi:10.3390/diagnostics11050799), 2021-04-28
Supplement: s1 [file s1]

# **In Comparison to Pathological Q Waves, Selvester Score is a Superior Diagnostic Indicator of Increased Long-Term Mortality Risk in ST Elevation Myocardial Infarction Patients Treated with Primary Coronary Intervention**

**Maria Holicka <sup>1,2</sup>, Pavla Cuckova <sup>1,2</sup>, Katerina Hnatkova <sup>3</sup>, Lumir Koc <sup>1,2</sup>, Tomas Ondrus <sup>1,2</sup>, Petr Lokaj <sup>1,2</sup>, Jiri Parenica <sup>1,2</sup>, Tomas Novotny <sup>1,2,\*</sup>, Petr Kala <sup>1,2</sup>, and Marek Malik <sup>2,3</sup>**

<sup>1</sup> Department of Internal Medicine and Cardiology, University Hospital Brno, Jihlavská 20, 625 00 Brno, Czech Republic; holicka.maria@fnbrno.cz (M.H.); cuckova.pavla@fnbrno.cz (P.C.); koc.lumir@fnbrno.cz (L.K.); ondrus.tomas@fnbrno.cz (T.O.); lokaj.petr2@fnbrno.cz (P.L.); parenica.jiri@fnbrno.cz (J.P.); kala.petr@fnbrno.cz (P.K.)

<sup>2</sup> Department of Internal Medicine and Cardiology, Faculty of Medicine, Masaryk University, Jihlavská 20, 625 00 Brno, Czech Republic; marek.malik@imperial.ac.uk

<sup>3</sup> National Heart and Lung Institute, Imperial College of London, 72 Du Cane Rd, Shepherd's Bush, London W12 0NN, UK; k.hnatkova@imperial.ac.uk

\* Correspondence: novotny.tomas3@fnbrno.cz; Tel.: +420-53223-2454

**Supplemental Table 1. QRS scoring system for estimating infarct size - the Selvester Score**  
(see Ref. 9)

| Lead                                                   | Q duration (msec) | R duration (msec) | Ratios          | Points  | Lead max. |   |
|--------------------------------------------------------|-------------------|-------------------|-----------------|---------|-----------|---|
| I                                                      | ≥30               |                   |                 | 1       | 2         |   |
|                                                        |                   |                   | R/Q≤1           | 1       |           |   |
| II                                                     | ≥40               |                   |                 | 2       | 2         |   |
|                                                        | ≥30               |                   |                 | 1       |           |   |
| aVL                                                    | ≥30               |                   |                 | 1       | 2         |   |
|                                                        |                   |                   | R/Q≤1           | 1       |           |   |
| aVF                                                    | ≥50               |                   |                 | 3       | 5         |   |
|                                                        | ≥40               |                   |                 | 2       |           |   |
|                                                        | ≥30               |                   |                 | 1       |           |   |
|                                                        |                   |                   | R/Q≤1           | 2       |           |   |
|                                                        |                   |                   | R/Q≤2           | 1       |           |   |
|                                                        |                   |                   |                 |         |           |   |
| V1                                                     | any               |                   |                 | 1       | 4         |   |
|                                                        |                   | ≥50               |                 |         |           | 2 |
|                                                        |                   | ≥40               |                 |         |           | 1 |
|                                                        |                   |                   |                 | R/S≥1   |           | 1 |
| V2                                                     | any               | ≤20               |                 | 1       | 4         |   |
|                                                        |                   | ≥60               |                 |         |           | 2 |
|                                                        |                   | ≥50               |                 |         |           | 1 |
|                                                        |                   |                   |                 | R/S≥1,5 |           | 1 |
| V3                                                     | any               | ≤30               |                 | 1       | 1         |   |
| V4                                                     | ≥20               |                   |                 | 1       | 3         |   |
|                                                        |                   |                   | R/Q or R/S ≤0,5 | 2       |           |   |
|                                                        |                   |                   | R/Q or R/S ≤1,5 | 1       |           |   |
| V5                                                     | ≥30               |                   | R/Q or R/S ≤1   | 1       | 3         |   |
|                                                        |                   |                   | R/Q or R/S ≤3   | 2       |           |   |
|                                                        |                   |                   |                 | 1       |           |   |
| V6                                                     | ≥30               |                   |                 | 1       | 3         |   |
|                                                        |                   |                   | R/Q or R/S ≤1   | 2       |           |   |
|                                                        |                   |                   | R/Q or R/S ≤3   | 1       |           |   |
| Lead max – the maximum point count for particular lead |                   |                   |                 |         |           |   |
